# Supplementary material for: Redox regulation of OxyR requires specific disulfide bond formation involving a rapid kinetic reaction path
Source: Springer Nature journal article supplement (doi:10.1038/nsmb856), 2004-11-14
Supplement: 41594_2004_BFnsmb856_MOESM1_ESM.pdf [file 41594_2004_BFnsmb856_MOESM1_ESM.pdf]

## Supplemental Data

Supplementary Table 1. Sensitivities of OxyR C199S and C208S single mutant strains and C199S C208S double mutant strain to H<sub>2</sub>O<sub>2</sub>.

The pAQ17, pGSO72 and pGSO11 plasmids expressing wild type OxyR and the C199S and C208S single mutants, respectively, from pUC vectors were described previously<sup>6</sup>. The C199S C208S double mutant was constructed by changing the Cys208 residue in pGSO72 by site directed mutagenesis. The zones of inhibition (in mm) surrounding disks impregnated with 10 µl of 10% H<sub>2</sub>O<sub>2</sub> were determined as in Kullik *et al.*<sup>6</sup>. The values are given for four independent isolates of the C199S C208S double mutant and represent the average of two determinations.

| <u>Strain</u>  | <u>Zone of inhibition</u> |
|----------------|---------------------------|
| Vector (pUC18) | 39                        |
| Wild type      | 23                        |
| C199S          | 40                        |
| C208S          | 28                        |
| C199S C208S    | 26                        |
| C199S C208S    | 27                        |
| C199S C208S    | 27                        |
| C199S C208S    | 28                        |
